# Supplementary material for: Molecular and morphological congruence of three new cryptic Neopetrosia spp. in the Caribbean
Source: PeerJ. 2019 Feb 5;7:e6371. doi: 10.7717/peerj.6371 (PMC6368163; doi:10.7717/peerj.6371)
Supplement: Supplemental Information 4 — Raw data of each spicule measurement to calculate minimum–mean (±1 standard deviation)–maximum of each voucher sample. [file peerj-07-6371-s004.xlsx]

## Sheet: Neopetrosia proxima
Catalogue number	I_UF 3856		IV_UF3858		VI_UF3860
Spicule count	Length(µm)	Width(µm)	Length(µm)	Width(µm)	Length(µm)	Width(µm)
1	160.474	8.05	167.8	9.162	170.523	7.692
2	180.232	8.331	136.97	9.41	142.977	9.89
3	160.374	4.837	148.635	5.316	168.036	9.487
4	192.95	7.3	144.462	11.178	164.941	10.302
5	165.826	6.627	159.533	9.963	156.595	9.487
6	166.923	7.684	159.002	9.584	148.141	10.817
7	152.435	5.958	147.822	7.166	179.352	11.728
8	173.767	6.277	151.487	3.916	149.616	10.31
9	119.529	7.352	149.721	11.178	169.005	9.924
10	177.97	5.293	148.553	9.26	161.021	10.335
11	178.498	8.483	165.082	8.687	147.109	9.769
12	98.522	7.613	143.57	8.315	168.297	9.478
13	154.649	7.733	153.314	9.21	145.804	8.896
14	183.662	6.218	166.103	8.877	179.538	8.915
15	112.043	5.145	167.251	9.611	158.762	6.606
16	168.799	7.94	129.019	9.405	147.05	9.075
17	182.77	8.487	117.422	11.655	117.384	9.103
18	161.472	4.656	163.805	10.906	163.687	10.194
19	177.909	6.634	133.95	10.497	169.136	7.841
20	175.017	8.433	154.669	10.22	155.162	8.693
21	158.743	6.748	159.446	9.453	152.188	7.924
22	146.597	6.132	150.077	10.823	152.433	8.796
23	169.523	3.636	135.159	10.569	149.481	10.165
24	155.152	5.064	127.308	7.473	171.629	9.959
25	145.956	4.153	145.834	9.095	170.545	8.168
26	161.903	4.659	155.734	5.657	151.073	10.53
27	150.217	5.028	153.934	7.619	172.096	9.215
28	180.81	8.622	153.969	10.454	130.128	9.487
29	141.557	3.636	123.472	9.763	163.845	9.487
30	133.622	7.361	138.678	9.236	173.573	9.656
31	135.155	9.93	164.446	7.392	163.805	8.915
32	111.33	6.917	153.376	9.479	157.967	8.117
33	159.645	9.951	156.746	8.884	174.719	7.291
34	141.833	6.503	145.597	9.622	178.413	6.126
35	173.485	8.457	122.23	7.228	168.1	10.102
36	155.986	8.129	165.223	8.509	156.267	8.732
37	159.274	7.361	142.728	9.856	138.775	10.714
38	170.087	8.29	147.388	9.856	143.629	8.654
39	170.572	7.643	92.421	9.036	142.227	10.165
40	170.938	7.143	151.933	9.511	179.937	7.473
41	159.464	7.198	148.023	8.711	149.196	8.242
42	161.129	6.684	156.373	11.033	169.852	10.454
43	168.742	9.564	148.872	5.178	139.833	8.877
44	171.845	7.198	148.695	10.223	161.547	8.168
45	155.413	10.907	137.867	11.216	172.093	10.795
46	154.515	8.846	144.543	10.378	175.58	9.699
47	145.122	7.848	145.125	5.067	149.912	9.415
48	169.358	4.85	149.814	7.484	152.748	10.194
49	180.469	7.525	130.985	9.133	181.397	9.647
50	134.637	8.17	127.01	9.808	159.277	10.074
MIN	98.522	3.636	92.421	3.916	117.384	6.126
MAX	192.95	10.907	167.8	11.655	181.397	11.728
Average	158.738	7.06408	146.624	9.02524	159.288	9.27566
Standard deviation	19.9023	1.65153	14.6254	1.73441	14.0029	1.13528

## Sheet: Neopetrosia sigmafera
Catalogue number	INV POR 1338		INV POR 1339		ICN-MHN(Po) 270		PPA-36		PPA-48		SZ-20		SZ-21		SZ-23		UF 3856
Spicule count	Length(µm)	Width(µm)	Length(µm)	Width(µm)	Length(µm)	Width(µm)	Length(µm)	Width(µm)	Length(µm)	Width(µm)	Length(µm)	Width(µm)	Length(µm)	Width(µm)	Length(µm)	Width(µm)	Length(µm)	Width(µm)
1	237.99	13.47	246.02	16.78	246.32	14.87	223.65	10.61	220.7	12.59	196.82	8.85	213.06	9.71	199.2	6.16	238.434	12.805
2	245.69	12.73	252.47	16.1	226.49	11.71	230.87	13.27	217.71	15.28	191.35	7.52	219.31	8.45	212.25	7.2	236.298	14.258
3	237.99	13.74	243.75	10.88	237.24	14.59	230.97	13.19	231.07	14.26	201.11	7.13	197.63	8.96	197.04	6.38	223.597	9.53
4	245.93	15.98	224.37	12.52	212.21	6.92	233.76	14.92	229.72	12.89	199.19	7.97	204.79	8.4	197.8	6.69	245.398	13.455
5	229.31	15.12	249.85	15.58	210.43	11.91	222.54	14.4	238.89	14.28	200.8	7.97	219.03	8.89	212.83	7.84	231.809	14.315
6	224.36	12.51	254.01	17.02	228.47	12.32	236.69	14.18	196.05	6.87	176.77	9.02	211.4	8.96	189.17	7.56	245.581	13.792
7	239.63	12.07	241.18	11.28	236.22	13.82	232.17	16.6	231.13	12.52	208.65	7.87	197.38	8.96	186.76	6.91	246.425	13.35
8	252.57	14.83	251.24	15.33	253.03	15.71	225.84	16.23	244.79	14.06	205.47	8.71	205.29	8.71	202.16	7.41	251.4	13.187
9	240.33	14.7	233.64	13.45	249.89	14.83	226.96	11.91	233.18	14.24	194.19	8.23	218.49	8.85	181.87	7.08	226.127	12.822
10	235.81	13.89	247.21	12.67	199.54	14.83	208.82	11.28	253.44	13.43	210.25	8.07	207.8	9.2	182.64	7.32	236.057	13.455
11	233.74	9.79	246.81	16.51	233.51	8.69	222.12	15.69	242.04	15.45	195.66	8.51	201.99	8.69	191.08	7.36	225.484	13.399
12	231.98	16.46	233.05	11.61	253.35	12.86	238.12	15.58	232.56	11.91	201.29	8.45	198.65	8.51	189.56	6.69	216.393	12.595
13	241.58	14.6	251.24	13.72	230.22	12.45	226.11	15.58	222.95	14.4	188.01	7.52	199.25	8.96	179.89	5.95	230.431	13.372
14	242.24	15.49	246.45	16.72	235.62	15.06	238.74	15.2	221.59	14.41	192.06	7.53	221.36	8.41	187.91	6.02	256.253	15.925
15	239.85	16.81	233.31	10.21	232.19	14.49	223.67	15.58	240.12	14.51	198.36	8.59	212.96	9.37	195.12	5.9	239.205	14.103
16	254.67	12.76	238.2	12.02	195.8	7.13	233.72	14.06	237.35	15.04	182.67	9.24	221.05	9.4	212.61	7.96	238.83	15.253
17	235.09	15.04	217.01	11.68	218.93	11.63	231.2	12.59	229.02	13.62	202.53	8.16	198.18	7.52	181.19	7.13	249.141	14.463
18	216.66	13.74	244.9	14.87	227.84	9.98	214.87	12.86	219.65	15.48	218.56	7.91	205.26	8.45	183.99	7.72	244.198	15.106
19	254.58	15.14	259.91	16.03	190.23	7.97	231.59	15.65	244.83	12.07	205.96	8.34	202.4	8.51	185.9	6.92	242.929	15.408
20	213.29	5.77	240.75	15.45	244.03	13.72	223.56	16.84	232.58	8.72	182.29	8.13	215.37	9.2	195.24	6.77	249.176	15.417
21	203.49	8.26	225.71	12.29	220.59	15.33	227.67	10.69	240.78	15.1	196.24	7.09	190.01	8.71	196.47	6.21	235.253	13.829
22	225.26	10.41	249.15	15.85	207.82	7.53	211.62	12.08	232.47	15.48	195.13	8.89	214.15	8.76	193.06	6.92	235.067	12.539
23	253.99	15.95	241.13	12.02	204.08	12.59	218.83	16.22	225.7	12.49	206.57	8.41	205.85	7.72	179.21	5.54	228.804	13.155
24	249.23	14.06	244.92	13.31	241.98	17.71	248.83	16.02	219.81	13.65	209.28	8.26	210.5	8.85	192.6	7.61	259.057	14.527
25	253.96	15.33	253.67	11.68	223.4	11.91	217.84	14.13	239.83	14.06	189.89	7.72	230.11	8.89	186.37	6.25	238.615	14.103
26	240.31	15.1	240.51	11.75	237.72	13.74	243.56	14.51	252.84	14.59	198.42	8.23	196.38	6.77	196.09	5.63	254.532	13.569
27	249.9	15.88	202.6	14.26	209.5	9.94	226.02	16.84	233.65	14.16	203.41	8.41	213.63	9.71	203.44	6.99	235.179	14.717
28	231.26	16.56	215.01	14.32	238.33	14.4	244.03	16.65	235.07	14.4	196.73	8.78	205.13	9.12	194.57	5.59	225.744	13.953
29	243.78	16.08	231.03	9.53	249.01	14.86	234.68	14.44	242.32	12.67	199.22	7.53	201.95	6.91	130.39	8.26	233.022	11.453
30	238.15	15.04	221.92	12.67	212.53	9.12	213.18	12.83	231.08	11.61	190.3	7.09	213.72	9.98	183.56	5.77	242.458	13.482
31	248.74	16.95	238.6	13.72	232.56	13.54	207.01	6.63	222.5	7.87	205.62	8.86	209.58	8.89	180.83	5.33	253.784	12.633
32	226.04	12.95	201.89	5.04	195.49	8.01	232.48	16.03	230.23	13.31	191.82	8.78	205.29	9.47	192.47	5.38	237.538	13.364
33	249.85	15.71	260.17	11.5	223.55	13.89	224.68	10.17	230.48	14.62	191.46	8.34	200.79	8.89	205.26	8.4	241.824	12.497
34	212.96	6.98	250.68	12.46	240.89	12.73	219.61	13.74	243.68	14.44	208.09	7.74	213.36	7.96	196.06	8.26	216.025	13.877
35	213.57	7.57	255.64	12.45	231.75	11.5	230.67	15.92	234.66	13.85	189.54	8.51	207.57	9.73	176.06	8.13	239.709	14.536
36	239.86	10.35	215.04	10.71	208.3	9.71	232.6	14.22	239.57	14.78	199.09	8.41	197.85	9.12	194.33	8.59	240.883	13.647
37	243.96	17.78	246.42	15.48	210.12	8.31	218.88	14.7	233.46	14.49	197.76	8.41	212.95	9.5	207.96	8.39	219.753	12.963
38	235.17	17.35	237.6	12.38	238.74	13.85	233.35	16.46	253.52	12.86	153.28	9.3	193.46	8.23	184.18	6.25	224.678	12.949
39	251.97	16.36	242.66	14.7	247.1	16.23	200.56	12.32	219.38	8.85	204.75	8.86	227.02	7.97	186.37	5.33	218.504	11.948
40	233.66	12.45	252.38	12.07	234.15	11.63	174.13	6.53	223.25	12.76	202.45	8.59	198.23	8.59	172.44	6.88	248.242	15.043
41	228.44	12.92	249.68	10.77	223.9	10.09	221.59	13.71	234.97	14.1	194.8	6.92	204.53	8.76	210.66	7.97	246.154	13.477
42	231.12	10.01	218.1	11.37	227.9	13.97	232.13	14.66	230.15	13.82	203.95	8.45	204.7	8.16	184.48	8.01	173.431	13.482
43	232.79	17.25	252.94	15.56	244.64	13.74	238.52	14.1	225.18	14.41	200.51	7.84	193.82	9.71	175.18	4.87	222.441	14.69
44	249.1	16.93	215.3	14.35	236.33	12.88	238.79	16.27	225.88	12.88	198.8	8.89	213.16	9.2	206.54	6.88	239.858	13.511
45	235.4	14.16	240.23	12.03	209.98	9.02	216.1	12.77	224.11	15.02	195.93	8.81	204.24	9.07	191.21	7.2	240.623	14.418
46	246.61	17.34	253.82	14.6	210.66	7.52	242.33	15.95	244.15	12.53	197.33	8.51	225.12	8.69	193.13	5.16	238.287	14.103
47	238.33	16.67	251.83	14.08	232.24	10.48	244.03	14.87	235.38	13.5	214.24	7.87	201.69	9.29	183.99	5.34	241.645	14.618
48	235.13	14.87	247.5	12.67	195.39	6.33	211.01	17.61	237.65	15.04	195.34	8.07	213.87	7.72	188.64	7.56	214.977	15.408
49	238.85	15.95	239.13	15.04	189.53	6.53	233.93	15.95	238.96	13.57	177.31	8.45	137.64	10.33	186.09	6.21	239.081	13.095
50	234.03	14.05	258.64	14.55	238.07	12.07	230.46	14.49	235.54	15.48	200.47	7.84	115.49	8.85	185.43	5.94	238.975	6.517
MIN	203.49	5.77	201.89	5.04	189.53	6.33	174.13	6.53	196.05	6.87	153.28	6.92	115.49	6.77	130.39	4.87	173.431	6.517
MAX	254.67	17.78	260.17	17.02	253.35	17.71	248.83	17.61	253.52	15.48	218.56	9.3	230.11	10.33	212.83	8.59	259.057	15.925
Average	237.364	14.0382	240.185	13.2728	225.556	11.893	226.502	14.1546	232.712	13.4484	197.194	8.2316	204.649	8.7932	190.426	6.7964	235.946	13.5623
Standard deviation	11.7789	2.84839	14.4911	2.26898	17.4099	2.8899	12.9275	2.36199	10.3794	1.89704	10.5631	0.565781	18.6096	0.706389	13.2424	0.999524	14.056	1.5134

## Sheet: Neopetrosia dendrocrevacea
Catalogue number	UF 3859		INV POR1334		INV POR1333		ICN-MHN(Po) 0269		uncat PPA07		INV POR1335		P329ICN-MHN(Po) 02693		INV POR0535		INV POR 1336
Spicule count	Length(µm)	Width(µm)	Length(µm)	Width(µm)	Length(µm)	Width(µm)	Length(µm)	Width(µm)	Length(µm)	Width(µm)	Length(µm)	Width(µm)	Length(µm)	Width(µm)	Length(µm)	Width(µm)	Length(µm)	Width(µm)
1	166.166	8.65	121.03	4.08	113.26	4.44	175.88	5.33	178.52	6.77	148.95	7.72	152.21	7.09	172.33	8.54	157.23	5.33
2	163.573	8.376	131.94	4.44	121.1	5.31	141.53	5.66	159.14	6.14	158.44	9.24	143.17	6.02	180.84	6.99	166.4	6.25
3	154.942	9.921	124.31	4.87	106.74	5.63	184.97	8.26	164.92	7.87	133.76	4.78	160.32	6.92	158.66	6.91	159.01	5.77
4	160.633	7.635	134.06	5.75	118.12	6.33	157.2	4.94	150.52	4.94	140.4	5.16	156.19	8.51	159.93	6.21	133.29	5.93
5	144.486	9.142	137.65	5.66	128.7	5.01	165.31	8.78	163.78	6.57	125.95	5.47	148.07	6.69	152.01	7.61	156.64	5.93
6	173.587	8.558	136.82	5.04	128.75	5.77	160.94	6.99	111.12	6.57	153.75	5.95	152.6	6.38	186.11	9.37	189.11	6.87
7	172.762	7.057	129.29	5.04	134.2	5.75	157.58	4.08	158.1	7.08	143.8	6.87	167.93	5.4	182.59	8.16	176.99	7.72
8	166.595	7.632	131.76	5.04	110.31	4.76	172.84	7.63	144.4	6.92	151.98	6.33	144.78	5.16	180.27	5.77	174.29	6.63
9	167.056	5.871	129.42	5.33	113.79	4.2	153.83	5.93	166.95	7.2	150.26	6.44	154.75	5.59	163.04	6.63	165.43	6.63
10	169.794	6.337	135.66	5.47	123.34	4.78	165.19	5.38	151.76	6.57	160.62	6.88	146.93	7.13	133.85	5.93	171.08	7.2
11	151.608	6.935	126.79	4.94	136.5	5.01	165.23	6.33	131.32	4.51	154.83	7.57	155.93	7.97	150.77	7.2	142.47	6.19
12	161.916	7.385	116.29	5.04	131.5	4.42	160.05	6.69	166.38	7.97	115.18	5.04	150.81	6.25	177.96	6.65	174.34	6.29
13	174.208	6.371	123.95	5.33	125.41	5.77	154.24	4.42	167.62	6.02	153.57	7.52	149.4	6.74	172.06	4.42	173.56	6.63
14	177.983	7.264	133.57	6.16	105.33	5.16	141.87	6.21	151.76	6.16	156.98	7.91	154.88	6.44	157.86	7.13	173.45	6.57
15	161.341	7.813	122.4	5.66	97.54	4.78	170.38	8.9	180.78	6.33	157.18	6.63	131.26	5.04	181.39	7.82	179.92	6.02
16	145.663	8.367	139.48	4.55	110.7	4.08	172.49	6.99	165.09	8.07	150.87	5.54	154.96	5.75	192.7	7.52	166.9	6.57
17	177.447	10.538	127.05	5.66	109.38	4.62	160.93	7.96	166.76	7.09	149.6	7.53	160.21	8.81	175.44	7.52	144.34	5.59
18	188.287	6.095	121.44	4.62	135.31	5.47	163.3	8.34	162.78	7.25	144.9	6.99	147.18	5.77	179.34	7.53	164.99	7.09
19	160.15	7.988	122.62	5.63	130.74	4.89	181.82	8.96	168.84	6.44	157.07	6.53	164.63	8.31	168.08	8.86	168.41	7.36
20	153.764	4.904	139.11	4.94	109.28	4.81	168.55	7.08	167.37	7.25	129.94	5.47	149.19	5.66	173.18	7.58	163.45	6.29
21	161.608	7.635	139.5	5.38	113.58	4.08	156.39	7.74	158.65	5.95	142.01	5.54	147.92	6.25	154.21	5.77	171.57	6.63
22	176.237	8.188	136.16	6.99	119.01	4.76	139.74	6.69	151.91	6.87	149.01	4.78	143.3	5.33	182.98	5.93	157.83	5.82
23	182.816	8.156	118.97	4.94	113.63	4.55	173.59	6.99	164.14	7.35	153.33	7.09	130.18	5.77	172.5	8.34	170.84	6.29
24	183.17	2.781	127.56	5.59	127.46	4.17	191.57	9.74	177.66	6.63	149.19	5.96	154.44	6.74	162.6	7.82	148.99	6.44
25	182.043	7.25	122.29	4.08	122.05	5.63	150.92	5.75	180.52	8.85	133.6	4.94	147.66	6.74	167.25	6.99	174.88	6.19
26	161.248	8.137	130.96	5.93	131.78	3.65	139.25	4.7	157.38	6.25	167.68	7.96	167.89	6.87	171.82	7.53	139.9	5.77
27	168.778	6.654	139.94	5.33	85.75	4.17	172.99	9.12	143.3	6.74	157.13	7.08	153.48	7.09	177.45	7.52	160.77	7.13
28	156.257	7.599	126.7	4.44	117.67	4.42	175.82	7.41	151.4	7.29	156.72	7.52	146.59	5.82	147.73	8.26	169.44	7.13
29	179.698	6.311	119.12	5.01	113.17	4.36	165.68	6.33	150.17	7.53	149.66	6.33	147.05	6.65	174.56	8.81	170.11	6.21
30	172.613	9.17	127.11	5.33	119.17	4.08	186.28	7.08	156.29	6.44	160.34	4.7	153.94	6.02	167.25	5.7	169.16	6.19
31	165.395	6.758	123.75	4.51	126.9	4.51	146.77	8.31	151.81	6.92	138.07	3.57	158.31	6.75	198.14	7.96	136.52	4.62
32	178.689	8.467	143.34	5.33	131.85	4.2	164.77	8.89	152.51	5.33	145.78	6.21	144.32	5.38	181.15	7.2	185.21	6.25
33	142.381	7.575	127.3	5.33	119.5	4.2	166.58	8.9	170.45	5.82	156.46	6.57	148.5	6.38	173.18	7.56	184.68	6.69
34	159.23	7.484	141.2	5.63	112.15	3.96	169.12	7.74	144.97	6.25	158.07	7.72	154.98	7.29	171.02	9.38	165.22	6.33
35	167.609	4.999	149.46	4.17	149.88	4.89	163.93	8.69	160.43	6.88	157.31	6.29	134.36	6.63	178.03	9.33	176.21	7.32
36	184.858	9.691	131.86	5.33	131.17	5.16	150.97	7.13	150.33	5.75	149.47	6.29	149.16	5.18	174.42	8.59	165.55	5.4
37	177.899	6.323	139.57	5.77	107.48	4.42	184.55	7.72	153.67	5.59	103.03	5.33	166.55	5.82	174.15	8.34	182.12	6.99
38	176.921	5.413	114.49	5.18	111.51	4.17	171.45	6.99	157.45	6.19	147.9	6.75	154.57	5.93	193.37	8.23	167.55	6.65
39	165.063	8.518	136.47	4.08	128.08	5.01	149.59	6.21	158.61	6.87	141.57	5.9	147.65	6.75	173.74	7.13	176.41	5.93
40	152.496	7.142	128.99	4.89	120.8	4.51	179.76	9.82	147.61	6.92	168.63	8.23	162.46	6.91	148.14	7.13	159.89	6.24
41	184.991	8.303	125.49	5.04	114.81	3.57	152.11	7.72	134.41	5.28	127.8	6.16	144.4	6.99	157.37	7.2	187.12	6.19
42	161.804	7.719	126.77	4.77	119.78	5.01	172.55	8.54	163.76	6.75	143.87	6.91	144.49	6.87	182.74	7.97	161.15	7.13
43	182.361	5.148	119.42	4.87	119.65	5.77	167.25	7.96	160.43	6.88	137.43	5.54	167.34	6.53	171.01	7.53	137.53	6.16
44	157.652	7.452	124.8	4.01	102.01	4.94	157.5	6.14	166.38	7.97	143.58	8.07	144.11	5.18	183.21	8.59	160.28	7.08
45	145.32	9.627	136.69	5.75	123.93	4.44	152.9	6.53	167.88	8.6	151.99	6.92	165.55	7.13	177.16	7.32	155.09	6.14
46	166.562	7.731	130.59	4.7	118.56	5.01	179.87	7.97	111.12	6.57	164.58	8.45	164.67	6.91	157.53	5.16	162.42	6.33
47	175.062	8.231	136.15	3.75	114.2	5.04	148.57	8.51	158.1	7.08	138.07	6.38	142.55	7.74	172.83	6.99	167.53	6.33
48	152.895	8.584	134.19	5.16	110.05	4.42	161.83	6.92	163.78	6.57	157.31	6.29	131.17	6.16	153.51	6.65	162.78	6.14
49	157.396	4.089	137.93	4.42	133.13	5.54	175.66	8.23	150.52	4.94	145.78	6.21	153.56	6.63	176.03	7.72	167.15	6.02
50	90.786	7.554	125.88	4.94	114.33	4.78	178.62	7.09	131.34	4.51	158.65	6.53	163.16	6.33	183.67	7.2	161.81	6.29
MIN	90.786	2.781	114.49	3.75	85.75	3.57	139.25	4.08	111.12	4.51	103.03	3.57	130.18	5.04	133.85	4.42	133.29	4.62
MAX	188.287	10.538	149.46	6.99	149.88	6.33	191.57	9.82	180.78	8.85	168.63	9.24	167.93	8.81	198.14	9.38	189.11	7.72
Average	165.236	7.43056	130.146	5.078	119.261	4.7682	164.414	7.2484	156.498	6.6258	147.841	6.4758	151.594	6.488	171.143	7.404	165.14	6.3778
Standard deviation	15.91	1.48906	7.68954	0.618609	11.3286	0.604202	12.8512	1.37209	14.5517	0.933584	12.6298	1.12088	9.40873	0.860648	12.9314	1.06452	12.9537	0.575692

## Sheet: Neopetrosia cristata sp. nov.
Catalogue number	UF 3859
Spicule number	Length(µm)	Width(µm)
1	143.808	4.343
2	153.695	9.131
3	142.044	6.718
4	138.386	8.976
5	154.306	8.07
6	163.194	9.046
7	148.874	8.413
8	146.317	7.515
9	129.707	6.458
10	121.829	7.525
11	141.1	9.471
12	144.327	9.506
13	158.024	8.299
14	144.071	8.34
15	137.68	6.476
16	137.887	7.921
17	154.398	8.169
18	147.366	5.776
19	149.079	7.213
20	137.523	6.662
21	146.912	7.91
22	147.033	6.988
23	133.808	5.314
24	156.058	8.298
25	142.467	2.072
26	151.262	8.964
27	149.501	8.339
28	140.518	8.162
29	145.146	6.956
30	157.205	4.226
31	127.144	7.779
32	151.876	5.827
33	145.323	6.721
34	125.917	7.412
35	131.291	7.293
36	136.571	9.265
37	126.132	6.378
38	143.831	8.329
39	153.442	6.433
40	147.17	8.436
41	133.233	8.031
42	144.067	3.813
43	134.725	5.032
44	141.627	6.474
45	144.977	6.149
46	128.42	9.432
47	124.613	9.647
48	133.524	3.411
49	127.73	7.626
50	138.255	5.431
Min	121.829	2.072
Max	163.194	9.647
Average	142.068	7.20352
STDEV	9.79048	1.70691

## Sheet: summary
	I_UF 3856
Spicule	Length	Width
1	238.434	12.805
2	236.298	14.258										1	10.684	142.951	91	164	-75.964	12.805
3	223.597	9.53										2	11.871	176.563	147.172	240.066	-49.399	14.258
4	245.398	13.455					Species	Specimen	Location	Length (μm)	Width (μm)	3	7.716	122.385	32.25	248	-104.036	9.53
5	231.809	14.315					Neopetrosia proxima	UF 3856	Bocas del Toro, Panama	98—158.7 (± 19.9)—193	3—10.9 (± 1.7)—11	4	10.684	129.817	114.405	150	-66.371	13.455
6	245.581	13.792					Duchassaing & Michelotti (1864)	UF 3858	Bocas del Toro, Panama	92—146.6 (± 14.0)—168	3—9.0 (± 1.7)—12	5	11.871	188.655	130.252	255	-22.38	14.315
7	246.425	13.35						UF 3860	Bocas del Toro, Panama	117—159.3 (± 14.0)—181	6—9.3 (± 1.1)—12	6	11.277	73.729	22.312	188.993	-36.254	13.792
8	251.4	13.187						PPA 35	Bocas del Toro, Panama	75—NA (± NA)—205	2.7—NA (± NA)—10.7	7	10.684	117.294	45.388	236.197	-42.709	13.35
9	226.127	12.822						PPA 37	Bocas del Toro, Panama	85—NA (± NA)—167	1.7—NA (± NA)—12.7	8	10.684	129.786	49.676	231.353	-6.71	13.187
10	236.057	13.455						INV POR1306	Old Providence, Colombia	110—NA (± NA)—150	2.5—NA (± NA)—5	9	10.684	77.341	24.651	163.067	-57.265	12.822
11	225.484	13.399										10	10.684	187.239	126.441	255	-103.241	13.455
12	216.393	12.595					Neopetrosia dendrocrevacea	INV POR0535	Uraba, Colombia	134—171.4 (± 12.9)—198	4.4—7.4 (± 1.0)—9.4	11	10.684	124.94	5.5	255	-110.556	13.399
13	230.431	13.372						PPA 07	Bocas del Toro, Panama	111—156.5 (± 14.6)—181	4.5—6.6 (± 0.9)—8.9	12	10.09	187.33	157.363	231.5	-68.199	12.595
14	256.253	15.925						UF 3854	Bocas del Toro, Panama	91—165.2 (± 15.9)—188	2.8—7.4 (± 1.5)—10.5	13	10.684	100.647	60.5	130	-103.241	13.372
15	239.205	14.103						INV POR 1336	Cartagena, Colombia	133—165.1 (± 12.9)—189	4.6—6.4 (± 0.6)—7.7	14	13.058	187.82	115.397	254.651	58.57	15.925
16	238.83	15.253						INV POR1337	Cartagena, Colombia	139—164.4 (± 12.9)—192	4.1—7.3 (± 1.3)—9.8	15	11.277	194.522	144.889	249.296	-99.462	14.103
17	249.141	14.463						ICN-MHN(Po) 0269	Santa Marta, Colombia	130—151.6 (± 9.4)—168	5.0—6.5 (± 0.9)—9	16	12.464	179.004	122	243	-135	15.253
18	244.198	15.106						INV POR1335	Santa Marta, Colombia	103—147.8 (± 12.3)—169	4—6.5 (± 1.1)—9	17	11.871	171.003	107.365	255	18.435	14.463
19	242.929	15.408						INV POR1333	San Andres, Colombia	86—119.3 (± 11.3)—150	3.5—4.8 (± 0.6)—6	18	12.464	196.085	121.813	255	34.509	15.106
20	249.176	15.417						INV POR1334	San Andres, Colombia	114—130.1 (±7.7 )—149	5.1—3.8 (± 0.6)—7	19	12.464	208.361	114.667	255	36.87	15.408
21	235.253	13.829										20	12.464	199.783	162.444	247.333	-30.466	15.417
22	235.067	12.539					Neopetrosia sigmadocea	PPA 36	Bocas del Toro, Panama	174—226.5 (±2.4 )—248	6.5—14.2 (± 2.4)—17.6	21	11.277	194.633	133.058	243.173	-19.44	13.829
23	228.804	13.155						PPA 48	Bocas del Toro, Panama	196—232.7 (±10.4 )—233	6.9—13.5 (± 1.9)—15.5	22	10.09	81.018	31.444	130.389	-145.305	12.539
24	259.057	14.527						UF 3857	Bocas del Toro, Panama	173—235.9 (±14.1 )—259	6.5—13.6 (± 1.5)—15.9	23	10.684	178.755	126.667	234.907	-54.462	13.155
25	238.615	14.103						ICN-MHN(Po) 270	Cartagena, Colombia			24	11.871	164.465	112.657	255	-80.538	14.527
26	254.532	13.569						INV POR 1338	Cartagena, Colombia			25	11.277	100.43	47.728	225.444	-56.31	14.103
27	235.179	14.717						INV POR 1339	Cartagena, Colombia			26	11.277	114.676	51	165.797	-60.642	13.569
28	225.744	13.953						SZ-20	Martinique	153—197.2 (±10.6 )—219	6.9—8.2 (± 0.6)—9.3	27	11.871	159.471	129.895	222.336	-59.534	14.717
29	233.022	11.453						SZ-21	Martinique	115—204.6 (±18.6 )—230	6.8—8.8 (± 0.7)—10.3	28	11.277	112.361	31.148	238.593	-6.34	13.953
30	242.458	13.482						SZ-23	Martinique	130—190.4 (±13.2 )—190	4.9—6.8 (± 1.0)—8.6	29	9.497	190.058	131.267	255	-109.654	11.453
31	253.784	12.633										30	10.684	55.588	22.934	105.362	17.354	13.482
32	237.538	13.364					Neopetrosia sp. nov.	UF 3859	Bocas del Toro, Panama	121—142.1 (±9.8 )—163.2	2.1—7.2 (± 1.7)—9.6	31	10.09	80.206	36.556	146.333	25.017	12.633
33	241.824	12.497										32	10.684	129.492	47.135	252.941	-93.366	13.364
34	216.025	13.877										33	10.09	168.745	113.889	247	10.62	12.497
35	239.709	14.536										34	11.277	134.078	51	222	-90	13.877
36	240.883	13.647										35	11.871	133.721	66.052	235.137	-57.995	14.536
37	219.753	12.963										36	11.277	70.138	31.667	142.827	-70.56	13.647
38	224.678	12.949										37	10.684	61.079	27	129.834	-54.462	12.963
39	218.504	11.948										38	10.684	47.506	21	110.713	20.556	12.949
40	248.242	15.043										39	10.09	80.215	14	217.667	19.654	11.948
41	246.154	13.477										40	12.464	115.455	2	255	11.889	15.043
42	173.431	13.482										41	10.684	199.895	122.664	255	30.964	13.477
43	222.441	14.69										42	10.684	194.369	125.706	255	40.236	13.482
44	239.858	13.511										43	11.871	141.897	102	233.444	-53.746	14.69
45	240.623	14.418										44	11.277	137.589	36	192	-10.008	13.511
46	238.287	14.103										45	11.871	133.646	66.454	230.368	-3.013	14.418
47	241.645	14.618										46	11.277	137.168	104.556	202.222	9.462	14.103
48	214.977	15.408										47	11.871	195.077	135.09	255	-108.435	14.618
49	239.081	13.095										48	12.464	185.534	124.333	254.667	0	15.408
50	238.975	6.517										49	10.684	113.773	31.647	255	40.236	13.095
Min	173.431	6.517										50	5.342	208.837	144.688	255	20.556	6.517
Max	259.057	15.925
Average	235.946	13.5623													247.56
STDEV	14.056	1.5134
