# Supplementary material for: Molecular and morphological congruence of three new cryptic Neopetrosia spp. in the Caribbean
Source: PeerJ. 2019 Feb 5;7:e6371. doi: 10.7717/peerj.6371 (PMC6368163; doi:10.7717/peerj.6371)
Supplement: Supplemental Information 5 — Raw data of each sigma spicule measurement to calculate minimum–mean (±1 standard deviation)–maximum of each voucher sample. [file peerj-07-6371-s005.xlsx]

## Sheet: Hoja1
		P3147		P3149		P3287		P3115		P3104				P3089		P3090		P3093
		C-POR283		C-POR284		C-POR265		PPA-36		PPA-48		UF 3857		SZ-20		SZ-21		SZ-23
	#sigmas	Length (µm)	Width (µm)	Length (µm)	Width (µm)	Length (µm)	Width (µm)	Length (µm)	Width (µm)	Length (µm)	Width (µm)	Length (µm)	Width (µm)	Length (µm)	Width (µm)	Length (µm)	Width (µm)	Length (µm)	Width (µm)
	1	11.6		9.79		31.4		24.02		23.63		25.813		22.55		10.19		15.95
	2	19.65		10.75		26.17		18.13		12.45		27.043		29.06	88,25*11,9	9.97		28.5
	3	27.13		9.95		18.3		26.65		28.92		20.375		21.61	99,1*10	28.7		9.51
	4	25.62		9.14		17.99		28.87		11.38		24.585		20.59		25.05		18.43
	5	27.71		8.68		27.48		25.05		21.89		19.29		22.11		27.53		9.34
	6	11.69		9.73		12.1		15.05		22.66		18.782		29.51		25.99		17.14
	7	11.05		24.86		12.48		23.96		24.4		22.435		28.98		21.2383		30.99		Specimen	Number of sigmas	Location	Length (µm)
	8	28.73		12.45		11.22		12.66		16.99		20.845		23.06		28.7		22.61		PPA 36	15	Bocas del Toro, Panama	12.7—22.6—29.3
	9	11.01		24.92		23.94		23.63		19.9		25.318		26.37		9.97		23.28		PPA 38	13	Bocas del Toro, Panama	20.6—24.4—29.5
	10	27.77		30.23		11.33		25.13		13.03		24.933		20.57				22.69		UF 3857	20	Bocas del Toro, Panama	7.6—22.0—27.0
		20.196		15.05		19.241		19.05		33.09		25.105		24.441				19.844		INV POR 1338	10	Cartagena, Colombia	11.0—20.2—28.7
		28.73		30.23		31.4		15.64		23.27		18.782		29.51				30.99		INV POR 1339	10	Cartagena, Colombia	8.7—15.1—30.2
		11.01		8.68	min	11.22		29.09		22.56		22.048		20.57				9.34		ICN-MHN(Po) 270	10	Cartagena, Colombia	11.2—19.2—31.4
								29.29		21.09		24.585								SZ-20	10	Martinique	20.6—24.4—29.5
								22.75		33.09	max	22.909	max							SZ-21	6	Martinique	10.0—21.2—28.7
								22.598		11.38		21.999								SZ-23	10	Martinique	9.3—19.8—31.0
								29.29				22.339
								12.66				7.636
												22.956				1	19.359	240.701	217.773	249.55	-154.885	25.813
												22.768				2	20.435	244.29	231.862	250.673	-40.601	27.043
		yellow = average										22.0273				3	15.595	248.381	218.333	254.238	59.744	20.375
		Blue =max										27.043				4	18.821	243.56	203.226	253.776	-72.646	24.585
		Red= min										7.636				5	14.519	245.811	228.974	250.077	8.746	19.29
																6	14.519	244.548	229.757	248.12	38.66	18.782
																7	17.208	245.614	218.172	250.654	-11.31	22.435
																8	15.595	240.946	213.667	253.828	129.289	20.845
																9	19.359	244.066	190.667	255	-79.992	25.318
																10	18.821	241.343	207.723	254.599	-61.928	24.933
																11	18.821	239.269	209.922	251.824	83.29	25.105
																12	14.519	245.029	205.667	252.359	-51.34	18.782
																13	16.67	241.358	207	250.911	176.186	22.048
																14	18.821	244.647	214.667	250.34	-72.646	24.585
																15	17.208	243.973	234.667	249.595	-50.194	22.909
																16	16.67	241.269	203.333	250.667	0	21.999
																17	16.67	238.838	200.947	250.853	-23.199	22.339
																18	5.915	246.453	237.667	248.867	-41.186	7.636
																19	17.208	240.247	229.879	243.324	-63.435	22.956
																20	17.208	243.691	233	247.086	-14.931	22.768
