# Supplementary material for: Molecular and morphological congruence of three new cryptic Neopetrosia spp. in the Caribbean
Source: PeerJ. 2019 Feb 5;7:e6371. doi: 10.7717/peerj.6371 (PMC6368163; doi:10.7717/peerj.6371)
Supplement: Supplemental Information 7 [file peerj-07-6371-s007.xlsx]

## Sheet: Sheet1
Species		COI		28S rRNA		18S rRNA
	Voucher number	Primer pair	Annealing Temp (° C)	Primer pair	Annealing Temp (° C)	Primer pair	Annealing Temp (° C)
Neopetrosia dendrocrevacea	UF 3854	NPIIISPECF1/JGHCO2198	48	C2/D2	55	400F/NPIIIRV	55
Neopetrosia proxima	UF 3856	LCO1490/COINPIIIRV	48	5F/NPRV2	50	F/HomoR	50
Neopetrosia sigmafera	UF 3857	LCO1490/HCO2198	48	NPsigmasFWD/1072RV	50	1200F/NPIIRV4	48
Neopetrosia proxima	UF 3858	LCO1490/COINPIIIRV	48	NPFWD2/NPRV2	60	F/HomoR	50
Neopetrosia cristata	UF 3859	NPIIISPECF1/COINPIIISPECRV1	55	NPFWD1/NPRV1	60	F/HomoR	50
Neopetrosia proxima	UF 3860	LCO1490/HCO2198	48	5F/NPRV2	55	F/HomoR	50
								℃
